# Supplementary material for: Placental Mitochondrial DNA Content and Particulate Air Pollution during in Utero Life
Source: PubMed Central journal article supplement (PMC3440109; doi:10.1289/ehp.1104458), 2012-05-24
Supplement: ehp.1104458.s001.pdf [file ehp.1104458.s001.pdf]

**Supplemental Materials:**

**Placental Mitochondrial DNA Content and Particulate Air Pollution During *in Utero* Life**

Bram G. Janssen<sup>1</sup>, Elke Munters<sup>1</sup>, Nicky Pieters<sup>1</sup>, Karen Smeets<sup>1</sup>, Bianca Cox<sup>1</sup>, Ann Cuypers<sup>1</sup>, Frans Fierens<sup>2</sup>, Joris Penders<sup>3</sup>, Jaco Vangronsveld<sup>1</sup>, Wilfried Gyselaers<sup>4</sup>, Tim S. Nawrot<sup>1,5</sup>

<sup>1</sup> Centre for Environmental Sciences, Hasselt University, Diepenbeek, Belgium

<sup>2</sup> Belgian interregional Environment Agency, Brussels, Belgium

<sup>3</sup> Biomedical Research Institute, Hasselt University, Diepenbeek, Belgium

<sup>4</sup> Department of Obstetrics, East-Limburg Hospital, Genk, Belgium

<sup>5</sup> Department of Public Health, Occupational and Environmental Medicine, Leuven University (KULeuven), Leuven, Belgium

**Table of Contents:**

|                                       |       |
|---------------------------------------|-------|
| Supplemental Materials, Table 1 ..... | pg. 2 |
| Supplemental Materials, Table 2 ..... | pg. 3 |

**Supplemental Materials, Table 1.** Exposure characteristics of nitrogen dioxide.

| Pollution indicator                                       | Mean <sup>a</sup> | SD  | 25 <sup>th</sup> percentile | 75 <sup>th</sup> percentile |
|-----------------------------------------------------------|-------------------|-----|-----------------------------|-----------------------------|
| Nitrogen dioxide (NO <sub>2</sub> ),<br>µg/m <sup>3</sup> |                   |     |                             |                             |
| Week (Mean Lag 0-7)                                       | 22.0              | 7.8 | 16.5                        | 26.7                        |
| Last month                                                | 22.9              | 7.5 | 17.5                        | 27.8                        |
| Trimester 1                                               | 20.1              | 5.9 | 16.2                        | 23.6                        |
| Trimester 2                                               | 21.6              | 5.9 | 17.4                        | 25.5                        |
| Trimester 3                                               | 22.9              | 7.0 | 18.4                        | 27.2                        |
| Whole pregnancy                                           | 21.5              | 5.0 | 18.6                        | 24.5                        |

<sup>a</sup>NO<sub>2</sub> values are presented as arithmetic mean with standard error and 25<sup>th</sup>-75<sup>th</sup> percentile.

**Supplemental Materials, Table 2.** Estimated change in placental and umbilical cord blood mtDNA content in association with NO<sub>2</sub> during pregnancy or distance from residence to nearest major road.

| Variable                                     | Placental tissue ( <i>n</i> = 174) |                |                 | Umbilical cord blood ( <i>n</i> = 176) |               |                 |
|----------------------------------------------|------------------------------------|----------------|-----------------|----------------------------------------|---------------|-----------------|
|                                              | Percentage change                  | 95% CI         | <i>p</i> -value | Percentage change                      | 95% CI        | <i>p</i> -value |
| Time window, NO <sub>2</sub> <sup>a, b</sup> |                                    |                |                 |                                        |               |                 |
| Trimester 1                                  | 14.1%                              | -2.5 to 33.4%  | 0.10            | 6.0%                                   | -6.1 to 20.0% | 0.38            |
| Trimester 2                                  | -9.6%                              | -23.0 to 6.1%  | 0.22            | 6.8%                                   | -6.0 to 20.9% | 0.30            |
| Trimester 3                                  | -21.8%                             | -32.1 to -9.8% | 0.0009          | 4.4%                                   | -6.6 to 16.7% | 0.44            |
| Last month                                   | -14.4%                             | -26.5 to -0.3% | 0.05            | 6.2%                                   | -5.5 to 19.3% | 0.29            |
| Week (Mean Lag 0-7)                          | -3.0%                              | -16.0 to 12.0% | 0.68            | -2.3%                                  | -12.4 to 9.0% | 0.68            |

<sup>a</sup> Effect size was estimated for each 10 µg/m<sup>3</sup> increase in NO<sub>2</sub> exposure at mother's residence during the corresponding period.

<sup>b</sup> Adjusted for newborn's sex (boy/girl), maternal age (years), parity (continuous), gestational age (weeks), ethnicity (European/non-European), smoking status (never, before, current), season (cold/warm period) and apparent week temperature (°C). Additionally, umbilical cord blood was adjusted for blood cell count (# of white blood cells, % neutrophils and # of platelets).
